# Supplementary material for: A Novel Binding Mode Reveals Two Distinct Classes of NMDA Receptor GluN2B-selective Antagonists
Source: PubMed Central journal article supplement (PMC4859819; doi:10.1124/mol.115.103036), 2016-05
Supplement: supp_mol.115.103036_Supplemental_103036.pdf [file supp_mol.115.103036_Supplemental_103036.pdf]

David Stroebel\*, Derek L. Buhl\*, John D. Knafels, Pranab K. Chanda, Michael Green, Simone Sciabola, Laetitia Mony, Pierre Paoletti<sup>§</sup>, and Jayvardhan Pandit<sup>§</sup>; “A novel binding mode reveals two distinct classes of NMDA receptor GluN2B-selective antagonists”, in *Molecular Pharmacology*

**Supplementary Figure 1: X-ray crystal structure of the GluN1/GluN2B NTD dimer in complex with MK-22**

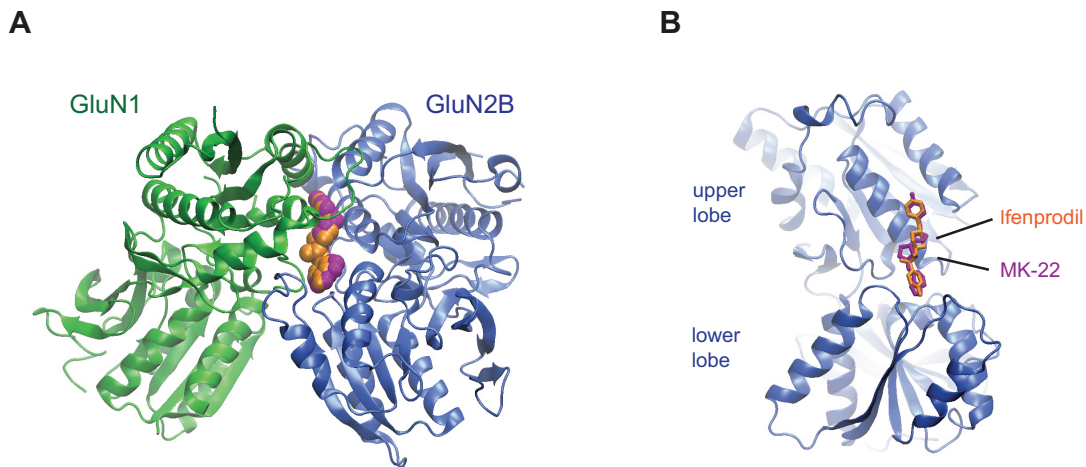

**A.** Structures of the GluN1/GluN2B NTD heterodimer in complex with MK-22. For comparison purposes, the ifenprodil molecule as seen in the GluN1/GluN2B NTD-ifenprodil complex is superimposed. The two ligands shown in sphere representation (ifenprodil in orange, MK-22 in purple) sit at the heterodimer interface. **B.** Side view (rotated 90°) with the GluN1 NTD removed and the ligands shown in stick representation.

**Supplementary Figure 2: Two subcavities at the GluN1/GluN2B NTD heterodimer interface**

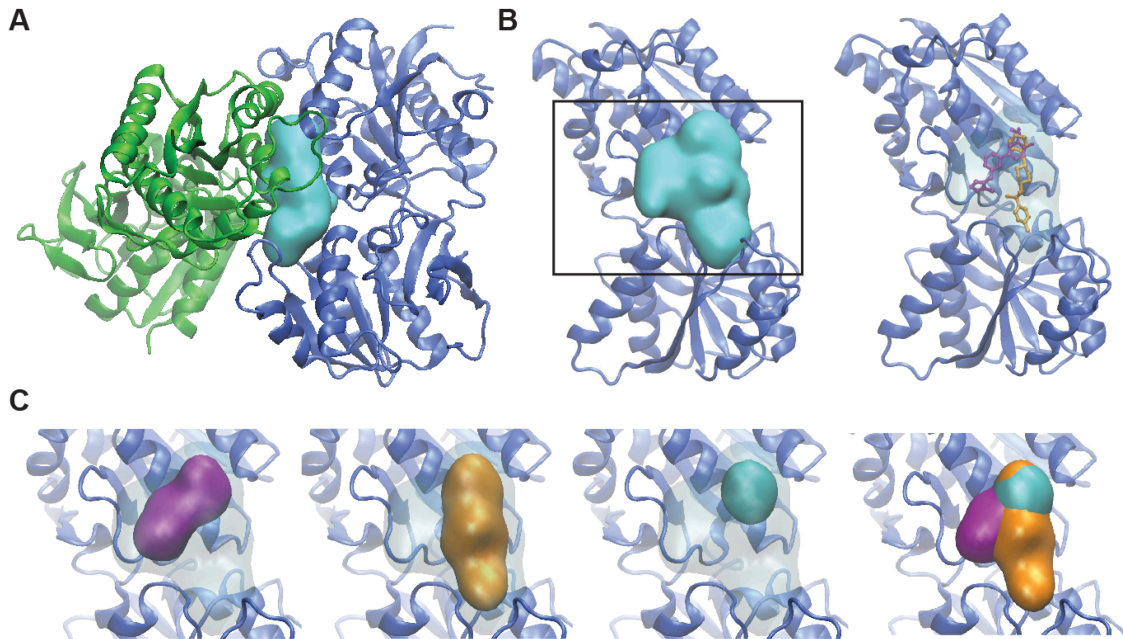

**A.** Illustration of the cavity at the dimer interface between GluN1 and GluN2B NTDs. **B.** Side view (rotated 90°) with the GluN1 subunit removed. Left: Cavity contour. Right: Ligand poses (EVT-101 in purple, ifenprodil in orange) within the cavity (rendered transparent). **C-F.** The two subcavities. The estimated volume occupied by EVT-101 and ifenprodil are 150 Å<sup>3</sup> (panel C) and 240 Å<sup>3</sup> (panel D), respectively, while the estimated volume of the entire dimer cavity is 400 Å<sup>3</sup> (panel F). The part of the cavity common to both ligands occupies an estimated volume of 50 Å<sup>3</sup> (panel E).

**Supplementary Figure 3: *In silico* docking analysis based on the ifenprodil protein co-crystal structure**

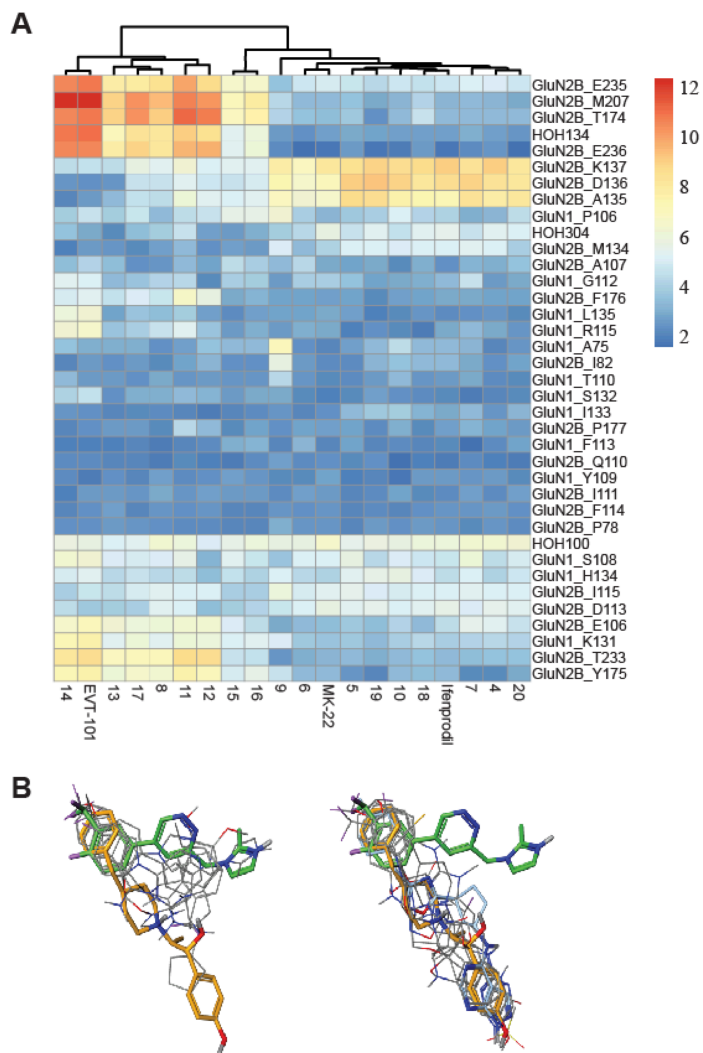

Analysis similar to the *in silico* docking depicted in Figure 4. **A.** Protein-ligand fingerprints ('heatmaps') based on the ifenprodil protein co-crystal structure. Amino acids are organized according to interaction distance (color code indicates minimal distance to ligands, in Å); numbers on the x-axis represent ligands listed in Table 2. Data indicate at least two main modalities of binding. **B.** Pose overlay for the two groups of compounds. Green: EVT-101; Orange: ifenprodil. MK-22 depicted as overlapping with ifenprodil on the left in cyan.

**Supplementary Table 1: X-ray crystallography data collection and refinement statistics**

|                                                      | EVT-101                 | MK-22                  | Ifenprodil             |
|------------------------------------------------------|-------------------------|------------------------|------------------------|
| <b>Data collection</b>                               |                         |                        |                        |
| Space group                                          | C21                     | C21                    | C21                    |
| Cell dimensions                                      |                         |                        |                        |
| <i>a, b, c</i> (Å)                                   | 268.4, 60.60, 144.5     | 268.88, 59.94, 144.45  | 268.46, 60.1, 145.0    |
| $\alpha, \beta, \gamma$ (°)                          | 90, 116.27, 90          | 90, 116.51, 90         | 90, 116.22, 90         |
| Resolution (Å)                                       | 129.57-2.76 (3.9-2.76)* | 120.31-2.98(4.21-2.98) | 120.42-2.77(3.91-2.77) |
| <i>R</i> <sub>sym</sub> or <i>R</i> <sub>merge</sub> | 0.055 (0.140)           | 0.054 (0.113)          | 0.056 (0.146)          |
| <i>I</i> / $\sigma$ <i>I</i>                         | 14.1 (7.6)              | 14.3 (7.5)             | 17.0 (8.3)             |
| Completeness (%)                                     | 98.3 (99.2)             | 96.2 (95.2)            | 99.0 (99.7)            |
| Redundancy                                           | 3.3 (3.4)               | 2.6 (2.3)              | 3.3 (3.4)              |
| <b>Refinement</b>                                    |                         |                        |                        |
| Resolution (Å)                                       | 40.41 – 2.76            | 30.04 – 2.98           | 27.92 – 2.77           |
| No. reflections                                      | 53264                   | 40941                  | 52883                  |
| <i>R</i> <sub>work</sub> / <i>R</i> <sub>free</sub>  | 0.1702 / 0.2137         | 0.1614 / 0.2140        | 0.1744 / 0.2102        |
| No. atoms                                            |                         |                        |                        |
| Protein                                              | 11050                   | 11019                  | 11019                  |
| Ligand/ion                                           | 486                     | 472                    | 534                    |
| Water                                                | 290                     | 265                    | 339                    |
| <i>B</i> -factors                                    |                         |                        |                        |
| Protein                                              | 77.3                    | 72.9                   | 75.03                  |
| R.m.s. deviations                                    |                         |                        |                        |
| Bond lengths (Å)                                     | 0.010                   | 0.010                  | 0.010                  |
| Bond angles (°)                                      | 1.18                    | 1.18                   | 1.19                   |
| Ramachandran Plot                                    |                         |                        |                        |
| Favored region                                       | 1349 (96.2%)            | 1335 (95.5%)           | 1342 (95.9%)           |
| Allowed region                                       | 44 (3.1%)               | 59 (4.2%)              | 46 (3.3%)              |
| Outlier region                                       | 9 (0.6%)                | 4 (0.3%)               | 11 (0.8%)              |

\*Values in parentheses are for highest-resolution shell.
